# Supplementary material for: Interferon receptor-deficient mice are susceptible to eschar-associated rickettsiosis
Source: eLife. 2021 Aug 23;10:e67029. doi: 10.7554/eLife.67029 (PMC8428839; doi:10.7554/eLife.67029)
Supplement: Figure 2—source data 1. [file elife-67029-fig2-data1.xlsx]

## Sheet: Fig2
	Figure 2: I.d. infection of Ifnar-/-Ifngr-/- mice by R. parkeri elicits disseminated, lethal disease.
	Legend: a) Weight changes over time in mice infected i.d. with R. parkeri. Data are shown as a percentage change to initial weight. In the left panel, all mice were infected with 107 PFU of R. parkeri; n=7 (WT), n=11 (Ifnar-/-), n=7 (Ifngr-/-), n=9 (Ifnar-/-Ifngr-/-) and 4 (Tlr4-/-) individual mice. In the right panel, Ifnar-/-Ifngr-/- mice were infected with the indicated R. parkeri PFU; n=7 (10…
		WT															Ifnar-/-															Ifngr-/-															Ifnar-/-Ifngr-/- (107)
Fig2a, weight:	days:	F, 18wo	M, 22wo	M, 22wo		M, 20wo	M, 20wo	M, 20wo	M, 20wo								F, 12wo	F, 12wo	F, 12wo		M, 25wo	M, 25wo	M, 25wo	M, 25wo		F, 18wo	F, 18wo	F, 18wo	F, 18wo			F, 16wo	F, 16wo	F, 16wo		F, 14wo	F, 14wo	F, 14wo	F, 14wo								Male, 12 weeks old (wo)	Male, 12wo	Male, 12wo
Weight (% of initial)	0	100	100	100		100	100	100	100								100	100	100		100	100	100	100		100	100	100	100			100	100	100		100	100	100	100								100	100	100
	1	100.69	100.34	99.89		100	100	100	100								97.7901	99.6991	100.098		99.11	99.94	99.34	98.89		100	100	100	100			100	95.26	101.16		100	100	100	100								93.47	96.79	97.77
	2	101.442	100.68	99.79		99.8305	100.175	102.281	99.6656								98.1584	99.3982	100.18		98.23	99.87	98.69	97.78		100	100	100	100			100.351	96.408	102.932		99.46	99.63	98.69	98.31								95.1018	97.9344	99.2317
	3	102.19	101.01	99.68		99.661	100.35	104.561	99.3311								98.5267	99.0973	100.262		97.34	99.81	98.03	96.66		100	100	100	100			100.702	97.5575	104.707		98.93	99.26	97.39	96.62								96.7385	99.082	100.694
	4	102.94	101.35	99.57		100.678	99.3007	104.456	98.9967								98.895	98.7964	100.343		96.45	99.74	97.38	95.55		100	100	100	100			101.05	98.71	106.48		98.39	98.9	96.08	94.93								98.38	100.23	102.16
	5	102.9	103.38	101.06		97.6271	95.8042	100.351	95.9866								99.1436	99.0973	99.2395		96.77	98.19	97.11	94.15		100	100	100	100			98.26	96.98	104.86		97.85	98.53	94.78	93.24								96.43	99.11	100.37
	6	104.73	105.41	102.55		99.322	99.3007	101.754	97.9933								99.3923	99.3982	98.1354		98.06	97.8	97.11	94.03		100.63	101.27	100.42	98.48			100.53	94.83	104.17		97.64	99.26	95.98	93.02								94.84	97.25	97.32
	7	103.592	100	96.17		99.661	98.6014	101.754	99.3311								100.801	101.179	100.368		99.35	97.42	97.11	93.91		101.25	102.54	100.85	96.96			100.447	95.2586	103.472		97.42	100	97.19	92.79								90.7806	93.377	93.829
	8	102.45	101.8	97.45		97.9661	97.9021	104.561	97.6589								102.21	102.959	102.601		98.49	97.67	96.68	93.91		100.21	104.66	101.48	99.35			100.37	95.69	102.78		96.78	99.75	97.19	92.57								86.72	89.51	90.33
	9	102.381	103.6	98.72		98.4181	98.8345	103.743	97.9933								102.744	102.073	101.603		97.63	97.93	96.24	93.91		99.17	106.78	102.12	101.74			100.596	95.6897	101.744		96.14	99.51	97.19	92.34								85.7765	89.5082	89.4672
	10	102.313	105.41	100		98.8701	99.7669	102.924	98.3278								103.278	101.187	100.605		96.77	98.19	95.8	93.91		99.17	104.52	102.4	100.87			100.825	95.6897	100.71		96.14	99.84	97.46	92.34								84.8346	89.5082	88.5998
	11	102.24	103.15	97.02		99.322	100.699	102.105	98.6622								103.812	100.301	99.6075		97.58	98.26	95.47	93.85		99.17	102.26	102.68	100			101.05	95.69	99.68		96.14	100.16	97.72	92.34								83.89	89.51	87.73
	12	103.47	104.5	98.72		97.2881	97.9021	103.509	97.3244								105.101	101.287	101.505		98.39	98.32	95.14	93.79		99.17	100	102.97	99.13			102.47	95.26	101.11		96.14	100.49	97.99	92.34								79.69	84.85	86.43
	13	104.37	104.95	99.57		97.6271	98.951	102.807	97.6589								106.39	102.273	103.402		99.19	98.39	94.82	93.74		99.17	100	102.97	99.13			103.16	96.55	100.19		96.14	100.49	97.99	92.34								77.96	83.93	85.35
	14	103.67	105.41	99.15		99.661	98.6014	99.2982	96.99								107.68	103.26	105.299		100	98.45	94.49	93.68		99.17	100	102.97	99.13			102.89	96.34	96.9		96.14	100.49	97.99	92.34								75.59	83.84	88.85
	15	104.9	105.41	99.57		100	99.6503	100.351	97.6589								106.077	102.574	103.484		99.68	98.06	94.16	92.92		99.17	100	102.97	99.13			103.16	97.2	98.61		96.14	100.49	97.99	92.34								74.74	82.2	87.99
	16	104.19	105.41	100		99.209	98.6014	101.52	97.1014								104.475	101.889	101.668		99.35	97.67	93.83	92.15		99.17	100	102.97	99.13			103.632	96.6954	99.9383		96.14	100.49	97.99	92.34								75.3915	83.9563	89.6283
	17	103.483	105.63	100.64		98.4181	97.5524	102.69	96.544								102.873	101.204	99.8528		99.03	97.29	93.5	91.39								104.105	96.1925	101.265													76.0391	85.7158	91.2639
	18	102.78	105.86	101.28		97.6271	96.5035	103.86	95.9866								104.199	103.511	101.276		98.71	96.9	93.18	90.63								104.58	95.69	102.59													76.69	87.48	92.9
	19	103.633	105.26	101.56		98.3051	98.2517	102.807	96.6555								103.978	102.834	101.766		99.44	97.8	94.16	91.92								104.184	96.25	99.7685													78.81	90.23	95.76
	20	104.49	104.65	101.84		98.7571	98.3683	104.211	97.6589								103.757	102.156	102.257		100.16	98.71	95.14	93.21								103.79	96.81	96.94													77.89	87.97	94.5
	21	104.014	104.05	102.13		99.209	98.4848	105.614	98.6622								103.536	101.479	102.748		100.89	99.61	96.13	94.5								104.632	97.2989	97.8858													79.19	87.02	94.5
	22	103.537	104.5	101.42		99.661	98.6014	107.018	99.6656								103.315	100.802	103.238		101.61	100.52	97.11	95.78								105.474	97.7874	98.8272													78.35	89.28	95.91
	23	103.06	104.95	100.71		100	99.5338	107.018	99.6656												101.37	100.06	96.92	95.55								106.32	98.28	99.77													76.6278	88.5902	95.0929
	24	103.061	105.41	100		100.339	100.466	107.018	99.6656												101.13	99.61	96.72	95.32								106.316	98.2759	99.7685													74.9087	87.9016	94.2751
	25	103.06	105.63	101.06		100.678	101.399	107.018	99.6656												100.89	99.16	96.52	95.08								106.32	98.28	99.77													73.19	87.21	93.46
	26	103.06	105.86	102.13		101.017	102.681	106.667	100.446												100.65	98.71	96.33	94.85								106.32	98.28	99.77													74.0374	89.918	97.1375
	27	103.06	106.76	102.55		101.356	103.963	106.316	101.226																							106.32	98.28	99.77													74.89	92.62	100.82
	28	103.73	107.66	102.98		101.695	105.245	105.965	102.007																							104.47	97.63	100.69													74.0551	92.0492	99.8141
	29	104.41	108.56	103.4		102.825	105.711	106.082	102.564																							102.63	96.98	101.62													73.23	91.48	98.81
	30	104.41	109.46	103.83		103.955	106.177	106.199	103.122																							102.63	96.98	101.62													70.19	92.21	98.51
	31	104.41	109.23	103.19		105.085	106.643	106.316	103.679																							102.63	96.98	101.62													67.15	92.95	98.22
	32	104.41	109.01	102.55		104.52	106.76	106.082	103.456																							102.63	96.98	101.62													64.11	93.69	97.92
	33	104.41	107.4	101.1		103.955	106.876	105.848	103.233																							102.63	96.98	101.62													61.07	94.43	97.62
	34	104.41	106	100.2		103.39	106.993	105.614	103.01																							102.63	96.98	101.62													61.07	94.43	97.62
	35	106.29	104.5	100.2		103.785	106.876	106.433	103.01																							104.47	96.12	103.59													61.57	97.28	99.96
	36	108.16	102.2	100.5		104.181	106.76	107.251	103.01																							106.32	95.26	105.56													62.06	100.13	102.3
	37	108.16	101.5	101		104.576	106.643	108.07	103.01																							106.32	95.26	105.56														100.94	103.4
	38	108.16	98.8	101.3		104.859	107.576	107.719	103.122																							106.32	95.26	105.56														101.75	104.49
	39	108.16	98	101.5		105.141	108.508	107.368	103.233																							106.32	95.26	105.56														102.56	105.58
	40	108.16	99.8	104		105.424	109.441	107.018	103.344																							106.32	95.26	105.56														102.56	105.58
Fig2b	days:	WT								Ifnar-/-															Ifngr-/-						Ifnar-/-Ifngr-/- 107										Tlr4-/-					Ifnar-/- Ifngr-/-105
Temp	0	99.4	98.9	98.4	96	96	96	96.5		101	101	100.5	101	96.3	97.7	97.2	98	100.5	99.6	100.1	100.5		100.1	99.6	98.4	99.6	100.1	100.5	99.6		99.8	99	98.6	100.5	101.5	101.3	100.5	101.1	101.1		99	99.1	99.2	99.3		98.9	99.4	100.1	100.5
	1	99.4	98.68	98.33	96	96	96	96.5		101.1	100.7	100.4	100.9	96.45	97.525	97.2	97.875	100.5	99.6	100.1	100.5		100.1	99.6	98.4	99.6	100.1	100.5	99.6		99.8	99	98.6	100.3	101.4	101.2	100.55	101.3	101.265		99.0667	99.1333	99.3667	99.2667		98.7	99.175	100.1	100.5
	2	99.6	98.45	98.25	97.6	97.85	97.75	98.1		100.133	99.7333	99.9667	100.433	96.6	97.35	97.2	97.75	100.375	99.7	100.15	100.375		100.4	99.9	99.0667	99.7	100.075	100.45	99.7		100.4	99.5667	99.3	100.367	100.667	100.933	100.6	101.5	101.43		99.1333	99.1667	99.5333	99.2333		98.5	98.95	100.325	100.525
	3	99.8	98.23	98.18	99.2	99.7	99.5	99.7		99.1667	98.7667	99.5333	99.9667	96.75	97.175	97.2	97.625	100.25	99.8	100.2	100.25		100.7	100.2	99.7333	99.8	100.05	100.4	99.8		101	100.133	100	100.433	99.9333	100.667	100.75	101.2	100.965		99.2	99.2	99.7	99.2		98.3	98.725	100.55	100.55
	4	100	98	98.1	98.3	98.6	99.9	99.5		98.2	97.8	99.1	99.5	96.9	97	97.2	97.5	100.125	99.9	100.25	100.125		101	100.5	100.4	99.9	100.025	100.35	99.9		101.6	100.7	100.7	100.5	99.2	100.4	100.9	100.9	100.5		99.15	99.1	99.4	99.2		98.1	98.5	100.775	100.575
	5	98.7	98.15	97.45	97.1	96.6	97	97		99.55	99.25	99.85	100	98	97.2	98.5	98.1	100	100	100.3	100		100.4	100.3	100.8	100	100	100.3	100		101.9	100.4	101	100	98.3	99.35	100.1	100.5	100.1		99.1	99	99.1	99.2		97.2	98.075	101	100.6
	6	98.6	98.3	96.8	99.8	99	99.1	99.2		100.9	100.7	100.6	100.5	98.25	97.1	98.25	98.05	99.5	99.45	99.65	99.5		99.2	100.2	100.1	99.85	99.3	100.15	100.25		100.8	101	101	99.5	97.4	98.3	99.0333	99.7333	98.9667		99.35	99.3	99.3	99.35		96.3	97.65	99.5	99.85
	7	98.05	96.7	96.4	99.6	99.2	99.3	99.4		100.05	100	99.55	99.25	98.5	97	98	98	99	98.9	99	99		99.4	100.25	99.6	99.7	98.6	100	100.5		100.15	100	99.55	99.5	93.75	96.6	97.9667	98.9667	97.8333		99.6	99.6	99.5	99.5		95.4	97.225	98	99.1
	8	97.5	96.67	96.43	99.6	99	99.3	99.5		99.2	99.3	98.5	98	98.3333	97.0667	97.8667	98.2667	99	98.9	99	99		99.6	100.3	99.1	99.6	98.8	100	100.25		99.5	99	98.1	99.5	90	94.9	96.9	98.2	96.7		99.4667	99.4	99.3333	99.3667		94.5	96.8	91.7	98.75
	9	97.9	96.63	96.47	99.7	99.3667	99.8	99.5667		99.7667	99.7333	99	98.6667	98.1667	97.1333	97.7333	98.5333	99	98.9	99	99		99.7333	99.9667	99.5667	99.5	99	100	100		99.1	98.6333	97.8	99.4333		89.7	97.3667	98.0333	95.5		99.3333	99.2	99.1667	99.2333		95.6	96.6	85.4	98.4
	10	98.3	96.6	96.5	99.8	99.7333	100.3	99.6333		100.333	100.167	99.5	99.3333	98	97.2	97.6	98.8	98.7667	98.7333	99	99		99.8667	99.6333	100.033	99	98.5333	99.2667	99.3333		98.7	98.2667	97.5	99.3667			97.8333	97.8667	94.3		99.2	99	99	99.1		95.5	96.475		97.9333
	11	98.7	97	96.3	99.9	100.1	100.8	99.7		100.9	100.6	100	100	98.25	97.425	97.7	98.85	98.5333	98.5667	99	99		100	99.3	100.5	98.5	98.0667	98.5333	98.6667		98.3	97.9	97.2	99.3			98.3	97.7	93.1		99.15	98.825	98.825	99.175		95.4	96.35		97.4667
	12	98.9	96.9	97.1	100	100.5	101	100		99.95	99.8	99.5	99.5	98.5	97.65	97.8	98.9	98.3	98.4	99	99		100	100.8	100.2	98	97.6	97.8	98		95.6	97.5	96.6	99.45			95.2	96.5	94.6		99.1	98.65	98.65	99.25		95.3	96.225		97
	13	98.3667	96.2	95.9	100.1	100.3	100.3	100.5		99	99	99	99	98.75	97.875	97.9	98.95	98.3	98.4	99	99		99.5667	100.2	99.2667	98	97.6	97.8	98		96.7	99.1	98.3	99.6			99.1	97.1	96		99.05	98.475	98.475	99.325		95.2	96.1		96.2
	14	97.8333	96.2	96.3	100	99.9	99.9	100		99	99.6	99	99.7	99	98.1	98	99	98.3	98.4	99	99		99.1333	99.6	98.3333	98	97.6	97.8	98		98.8	97.5	98.5	99.5			99.1	97.1	96.3		99	98.3	98.3	99.4		95.3	96.1333		97.15
	15	97.3	96.95	95.6	99	100.5	100.5	99.5		99.5	99.7333	99.1	99.8	99.05	98.2	97.975	98.875	98.3	98.4	99	99		98.7	99	97.4	98	97.6	97.8	98		97.6	97.3	97.7	99.5333			99.1	97.1	97.2		99.0333	98.3333	98.3667	99.5333		95.4	96.1667		98.1
	16	97.8	97.7	94.9	99.1	100.067	100.167	100		100	99.8667	99.2	99.9	99.1	98.3	97.95	98.75	98.3	98.4	99	99		99.1333	99.4667	98.1333	98	97.6	97.8	98		97.3667	97.7667	98.1667	99.5667			99.0667	97.6333	96.1667		99.0667	98.3667	98.4333	99.6667		95.5	96.2		96.3
	17	98.3	97.85	96.15	99.2	99.6333	99.8333	100.5		100.5	100	99.3	100	99.15	98.4	97.925	98.625	98.325	98.425	99	99.025		99.5667	99.9333	98.8667	98.025	97.65	97.85	98.05		97.1333	98.2333	98.6333	99.6			99.0333	98.1667	95.1333		99.1	98.4	98.5	99.8		95.4	96.1667		96.45
	18	98.8	98	97.4	99.3	99.2	99.5	101		100	100	99	100	99.2	98.5	97.9	98.5	98.35	98.45	99	99.05		100	100.4	99.6	98.05	97.7	97.9	98.1		96.9	98.7	99.1	97.7			99	98.7	94.1		99.0667	98.3	98.3667	99.6667		95.3	96.1333		96.6
	19	98.8	97.53	97.53	99	99.1	99.9	100.5		100.1	100.2	99.1	100.3	99.125	98.55	97.925	98.4	98.375	98.475	99	99.075		98.65	98.8	99.35	98.075	97.75	97.95	98.15		96.4	97.1	98.4	97			98.6333	98	92.2333		99.0333	98.2	98.2333	99.5333		95.2	96.1		96.75
	20	98.8	97.07	97.67	98.7667	98.9	99.4667	100		100	100	99	100	99.05	98.6	97.95	98.3						97.3	97.2	99.1						98.5	99.1	99.9	97.4			98.2667	97.3	90.3667		99	98.1	98.1	99.4		90.2	96.8333		96.9
	21	97.85	96.6	97.8	98.5333	98.7	99.0333	99.5						98.975	98.65	97.975	98.2						98.45	98.3	99.35						98.05	98.6	99.5	97.4			97.9	96.6	88.5										97.05
	22	96.9	97.4	98.4	98.3	98.5	98.6	99						98.9	98.7	98	98.1						99.6	99.4	99.6						97.6	98.1	99.1	97.4			97.81	96.85											97.2
	23	96.9	98.2	99	98.4667	98.6667	99.4333	99.1667						99.3	98.8	97.875	98.325						99.6	99.4	99.6						97.1333	98.2333	99	97.4667			97.72	97.1											97
	24	96.9	99	99.6	98.6333	98.8333	100.267	99.3333						99.7	98.9	97.75	98.55						99.6	99.4	99.6						96.6667	98.3667	98.9	97.5333			97.63	97.35											97.6
	25	96.9	97.1	97.5	98.8	99	101.1	99.5						100.1	99	97.625	98.775						99.6	99.4	99.6						96.2	98.5	98.8	97.6			97.54	97.6											98.2
	26	96.9	95.2	95.4	98.8667	98.5	100.067	98.9333						100.5	99.1	97.5	99						99.6	99.4	99.6						96.2	99	99.4	97.6667			97.0267	97.0333											98.8
	27	96.9	95.23	95.55	98.9333	98	99.0333	98.3667															99.6	99.4	99.6						96.2	99.5	100	97.7333			96.5133	96.4667											97.8
	28	96.9	95.25	95.7	99	97.5	98	97.8															99.6	99.4	99.6						95.7	98.65	98.85	97.8			96	95.9											96.8
	29	96.9	95.28	95.85	98.8333	97.7333	98.3333	97.5333															99.6	99.4	99.6						95.2	97.8	97.7	97.8667			96.375	95.5											96.2
	30	96.975	95.3	96	98.6667	97.9667	98.6667	97.2667															99.65	99.75	99.725						95.425	98.5	98.125	97.9333			96.75	95.1											95.6
	31	97.05	96.85	97.6	98.5	98.2	99	97															99.7	100.1	99.85						95.65	99.2	98.55	98			97.125	94.7											95.8333
	32	97.125	98.4	99.2	98.0333	97.8333	98.1667	97.3333															99.75	100.45	99.975						95.875	99.9	98.975	97.8			97.5	94.3											96.0667
	33	97.2	98.8	99	97.5667	97.4667	97.3333	97.6667															99.8	100.8	100.1						96.1	100.6	99.4	97.6			97.675	91.125											96.3
	34	97.2	99	98	97.1	97.1	96.5	98															99.8	100.8	100.1						96.1	100.6	99.4	97.4			97.85	90.5											96.15
	35	98.2	99	98.2	97.4333	97.4667	97.1667	98.3667															100	99.8	100.2						93.55	100.15	99.4	97.3333			98.025	90.1											96
	36	99.2	99.1	98.6	97.7667	97.8333	97.8333	98.7333															100.2	98.8	100.3						90	99.7	99.4	97.2667			98.2	88											96.7
	37	99.2	99.2	99	98.1	98.2	98.5	99.1															100.2	98.8	100.3							99.9333	99.8333	97.2			98.4												97.4
	38	99.2	99	99.1	98.8333	98.8333	98.8333	99.1															100.2	98.8	100.3							100.167	100.267	97.1333			98.6												97.1
	39	99.2	98.7	99	99.5667	99.4667	99.1667	99.1															100.2	98.8	100.3							100.4	100.7	97.0667			98.8												96.8
	40	99.2	97	99.2	100.3	100.1	99.5	99.1															100.2	98.8	100.3							100.4	100.7	97															96.5
Fig2C lesion score	Days:	WT mice											Ifnar-/-Ifngr-/- 107											Ifnar-/-Ifngr-/- 105											Ifnar-/-Ifngr-/- 104											Ifnar-/-Ifngr-/- 103
	0	0		0	0		0	0	0	0			0	0	0		0	0	0		0	0	0	0	0	0	0	0							0	0	0	0	0								0	0	0
	1	0		0	0		0	0	0	0			0	0	0		0	0	0		0	0	0	0	0	0	0	0							0	0	0	0	0								0	0	0
	2	0		0	0		0	0	0	0			1	1	1		0	0	0		0	0	0	0	0	0	0	0							0	0	0	0	0								0	0	0
	3	0		0	0		0	0.5	0.5	0			1.5	1	1		0	0	0.5		0.5	0.5	0.5	0	0	0	0	0							0	0	0	0	0								0	0	0
	4	0		0	0		0	0.25	0	0.25			2	1	1		0	0	1		1	1	1	1.5	1.25	1.25	0.75	1.25							0.75	0.25	0.5	0.5	1								0.5	0.25	0.5
	5	0		0	0		0	0.5	0	0.25			2	2	2.5		0.5	0.5	1		1.5	1.25	1.125	3	2.5	2.5	1.5	2.5							1.5	0.5	1	1	2								1	0.5	1
	6	0		0	0		0	0.5	0	0			2.66667	2.66667	3		1	1.5	2.5		2	1.5	1.25	3	2.75	2.5	1.75	2.5							1.5	1.25	1.5	1.5	2.25								1.25	1	1.25
	7	0		0	0		0	0	0	0			3.33333	3.33333	3.5		1	2	3.5		2.75	1.5	1.625	3	3	2.5	2	2.5							1.5	2	2	2	2.5								1.5	1.5	1.5
	8	0		0	0		0	0.25	0	0.25			4	4	4		1.17	2.17	3.5		3.5	1.5	2	3	2.75	2.5	2.25	2.25							2	2.75	2.75	2.25	3								1.75	2.5	1.5
	9	0		0	0		0	0.333333	0	0.333333			4	4	4		1.33	2.33	3.5		3.41667			3	2.5	2.5	2.5	2							2.5	3.5	3.5	2.5	3.5								2	3.5	1.5
	10	0		0	0		0	0.416667	0	0.416667			4	4	4		1.5	2.5	3.5		3.33333				2.33333			2							2.33333	3	3	2.5	3								1.83333	3	1.83333
	11	0		0	0		0	0.5	0	0.5			4	4	4		2	2.75	3.5		3.25				2.16667			2							2.16667	2.5	2.5	2.5	2.5								1.66667	2.5	2.16667
	12	0		0	0		0	0.5	0	0.5			3	4	4		2.5	3	3.5		3.125				2			2							2	2	2	2.5	2								1.5	2	2.5
	13	0		0	0		0	0.25	0	0.75			3	3	4		2.5	3.25	3.25		3				2.5			2							2	2.5	2	2	2								1.5	2	2
	14	0		0	0		0	0.5	0	1.5			3	3	4		2.5	3.5	3		2.9375				3			2.875							2	2.75	2.25	2.375									1.75	2.25	2.25
	15	0		0	0		0	0.5	0	1.5			2	2.5	3		2.6	3.4	2.7		2.875				3.5			3.75							2	3	2.5	2.75									2	2.5	2.5
	16	0		0	0		0	0.416667	0	1.25			1.66667	2.33333	3.16667		2.7	3.3	2.4		2.8125				3.5			3.5							2	2.5	2.5	2.75									2	3	2.5
	17	0		0	0		0	0.333333	0	1			1.33333	2.16667	3.33333		2.8	3.2	2.1		2.75				3.25			3.25							2.25	2.625	2.5	2.375									2	3	2.625
	18	0		0	0.25		0	0.25	0	0.75			1	2	3.5		2.9	3.1	1.8						3			3							2.5	2.75	2.5	2									2	3	2.75
	19	0		0	0.5		0	0	0	0.5			0.666667	1.66667	3.33333		3	3	1.5						2.625			2.625							2.375	2.5625	2.375	2									1.875	2.875	2.5625
	20	0		0.25	0.75		0	0	0	0.333333			0.333333	1.33333	3.16667		2.75	2.25	1.25						2.25			2.25							2.25	2.375	2.25	2									1.75	2.75	2.375
	21	0		0.5	1		0	0	0	0.166667			0	1	3		2.5	1.5	1						1.875			1.875							2.125	2.1875	2.125	2									1.625	2.625	2.1875
	22	0		0.75	1		0	0	0	0			0	1			2.3	1.6	1						1.5			1.5							2	2	2	2									1.5	2.5	2
	23	0		1	1		0	0	0	0			0	1			2.1	1.7	1						1			1							2	2	2										1.5	2	2
	24	0		1	1		0	0	0	0			0	1			2.8	3.2	2.1						0.833333			0.833333								2.5	1.5										1	2.25	1.66667
	25	0		0.75	0.75		0	0	0	0			0	1			2.9	3.1	1.8						0.666667			0.666667								3	1										0.5	2.5	1.33333
	26	0		0.5	0.5		0	0	0	0			0	1			1.5	2	1						0.5			0.5								3.5	0.5										0	2.75	1
	27	0		0	0		0	0	0	0			0.5	1			1.75	2	1						0.5			0.5								3.25	0.5										0	2.625	1
	28	0		0	0		0	0	0	0			1	1			2	2	1						0.5			0.5								3	0.5										0	2.5	1
	29	0		0	0		0	0	0	0			1	1			1.6	1.6	0.8						0.25			0.25								3	0.5										0	2.125	0.5
	30	0		0	0		0	0	0	0			1	1			1.2	1.2	0.6						0			0								3	0.5										0	1.75	0
	31	0		0	0		0	0	0	0			1	1			2.8	3.2	2.1						0			0									0.5										0	1.5	0
	32	0		0	0		0	0	0	0			1	1			2.9	3.1	1.8						0			0									0.5										0	1.25	0
	33	0		0	0		0	0	0	0			0.5	0.5			0	0	0						0			0									0.5										0	1	0
	34	0		0	0		0	0	0	0			0.5	0.5			0	0	0						0			0									0.5										0	0.75	0
	35	0		0	0		0	0	0	0			0.5	0.5			0	0	0						0			0									0.5										0	0.5	0
	36	0		0	0		0	0	0	0			0	0			0	0	0						0			0									0.25										0	0.25	0
	37	0		0	0		0	0	0	0			0	0			0	0	0						0			0									0										0	0	0
	38	0		0	0		0	0	0	0			0	0			0	0	0						0			0									0										0	0	0
	39	0		0	0		0	0	0	0			0	0			0	0	0						0			0									0										0	0	0
	40	0		0	0		0	0	0	0			0	0			0	0	0						0			0									0										0	0	0
Fig2D, survival		Days	WT	Ifnar-/-	Ifngr-/-	Ifnar-/- Ifngr-/-107	Ifnar-/-Ifngr-/- 105	Ifnar-/-Ifngr-/- 104	Ifnar-/- Ifngr-/-103	Ifnar-/- Ifngr-/- 102	Ifnar-/-Ifngr-/- 101	Tlr4-/- 107	CD-1 10^7
	M, 22wo	40	0
	M, 22wo	40	0
	F, 18wo	40	0
	M, 20wo	40	0
	M, 20wo	40	0
	M, 20wo	40	0
	M, 20wo	40	0
	F, 12wo	40		0
	F, 12wo	40		0
	F, 12wo	40		0
	M, 25wo	40		0
	M, 25wo	40		0
	M, 25wo	40		0
	M, 25wo	40		0
	F, 18wo	40		0
	F, 18wo	40		0
	F, 18wo	40		0
	F, 18wo	40		0
	F, 14wo	40			0
	F, 14wo	40			0
	F, 14wo	40			0
	F, 14wo	40			0
	F, 16wo	40			0
	F, 16wo	40			0
	F, 16wo	40			0
	Male, 12 weeks old (wo)	36				1
	Male, 12wo	40				0
	Male, 12wo	40				0
	F, 14wo	8				1
	M, 14wo	9				1
	M, 14wo	40				0
	F, 15wo	39				1
	M, 17wo	36				1
	M, 18wo	21				1
	F, 25wo	40				0
	M, 14wo	10				1
	M, 14wo	13				1
	M, 12wo	9					1
	M, 12wo	9					1
	M, 23wo	9					1
	M, 23wo	40					0
	M, 12wo	40					0
	M, 16wo	21					1
	M, 16wo	40					1
	M, 16wo	38						1
	M, 16wo	23						1
	M, 9wo	13						1
	M, 16wo	22						1
	M, 16wo	23						1
	M, 16wo	30						1
	M, 16wo	40						0
	M, 20wo	40							0
	M, 20wo	40							0
	M, 20wo	40							0
	F, 10wo	16							1
	M, 10wo	25							1
	M, 9wo	13							1
	F, 10wo	40							1
	M, 9wo	40							0
	F 10wo	40								0
	F, 10wo	40								0
	M, 9wo	11								1
	M, 13wo	40								0
	M, 23wo	12								1
	M, 23wo	12								1
	M, 23wo	12								1
	M, 16wo	40									0
	M, 16wo	40									0
	M, 16wo	40									0
	M, 13wo	29									1
	M, 9wo	40									0
	M, 10wo	40									0
	F, 10wo	40									0
	F, 16wo	40										0
	F, 16wo	40										0
	F, 16wo	40										0
	F, 16wo	40										0
	F, 9wo	40											0
	F, 9wo	40											0
	F, 9wo	40											0
	F, 9wo	40											0
	F, 9wo	40											0
Fig 2E	PFUs , ID	WT spleen	WT liver		Ifnar-/- Ifngr-/- spleen	Ifnar-/- Ifngr-/- liver
		160	320		136000	13600
		160	320		20800	29440
					152000	10880
		160	320
		160	320		198400	83200
					228800	107200
					114400	49600
					144800	60800
[truncated: 32 more columns]
