# Supplementary material for: Interferon receptor-deficient mice are susceptible to eschar-associated rickettsiosis
Source: eLife. 2021 Aug 23;10:e67029. doi: 10.7554/eLife.67029 (PMC8428839; doi:10.7554/eLife.67029)
Supplement: Figure 4—source data 1. [file elife-67029-fig4-data1.xlsx]

## Sheet: Fig4
	Figure 4: R. parkeri Sca2 contributes to dissemination from skin to spleens and livers.
	Legend: a) Survival of Ifnar-/-Ifngr-/- mice upon i.v. infection with 5 x 106 PFU of R. parkeri. n=7 (WT), 10 (sca2::Tn), and 7 (MC1_RS08740::Tn R. parkeri) individual mice. Data are the combination of two independent experiments. b) Survival of Ifnar-/-Ifngr-/- mice upon i.v. infection with 107 R. parkeri. n=7 (WT) and 10 (sca2::Tn) individual mice. Data are the combination of two independent ex…
Fig4a, Survival		days:	WT	sca2::Tn 5x10^6	MC1_RS08740
		5	1
		5	1
		6	1
		5	1
		5	1
		5	1
		6	1
		40		0
		40		0
		40		0
		40		0
		40		0
		40		0
		40		0
		40		0
		40		0
		40		0
		7			1
		5			1
		5			1
		5			1
		5			1
		5			1
		5			1
Fig4b			Day	WT	sca2::TN 10^7
			5	1
			5	1
			5	1
			5	1
			5	1
			5	1
			5	1
			5		1
			5		1
			5		1
			40		0
			40		0
			40		0
			40		0
			40		0
			40		0
			40		0
Fig4c		days:	WT	sca2::Tn
		8	1
		9	1
		40	0
		21	1
		36	1
		39	1
		40		0
		40		0
		40		0
		40		0
		40		0
		40		0
		40		0
		40		0
Fig4d, Sca2 mouse weights		days	WT										sca2::Tn
		0	100	100		100	100	100					100	100	100	100		100	100	100	100
		1	100	98.2014		99.5375	99.2373	98.6622					99.2534	102.119	102.287	100.761		99.225	98.7585	99.0991	99.3087
		2	98.8485	96.7626		99.075	98.4746	97.3244					97.4967	100.783	100.633	99.2685		98.45	97.517	98.1982	98.6174
		3	97.697	95.3237		97.7361	96.3559	97.3244					95.74	99.4473	98.9781	97.7758		96.975	96.7137	97.7252	96.7363
		4	96.5455	93.8849		96.3973	94.2373	97.3244					93.9833	98.1115	97.3236	96.283		95.5	95.9104	97.2523	94.8553
		5	91.9091	90.3058		94.1091	91.1864	93.9799					92.556	96.4532	95.6204	94.5365		94.5	93.4275	95.1802	92.283
		6	87.2727	86.7266		89.8085	88.4746	93.2441					91.1287	94.795	93.9173	92.79		93.9	94.5797	95.3153	91.3183
		7	84.2182	83.1835		85.508	85.7627	86.7559					92.7317	95.7623	97.2993	94.335		93.3	95.7319	95.4505	90.3537
		8	81.1636	79.6403		81.2074	83.0508	80.2676					94.3347	96.7296	100.681	95.88		92.7	96.8841	95.5856	89.3891
		9		78.5971		83.1386	83.0508	80.1561					94.8324	97.5587	101.671	96.6264		93.9167	98.1175	95.5556	89.6034
		10				85.0698	83.0508	80.0446					95.3301	98.3878	102.66	97.3727		95.1333	99.3509	95.5255	89.8178
		11				87.001	83.0508	79.9331					95.8278	99.217	103.65	98.1191		96.35	100.584	95.4955	90.0322
		12				85.297	83.0508	75.2508					94.5762	98.2036	104.136	98.3878		94.65	98.7829	94.5946	89.3891
		13				84.2259	84.3729	70.1338					93.3245	97.1902	104.623	98.6565		96	100.487	95.045	89.7106
		14				87.7799	84.678	72.8428					95.2569	99.4012	112.263	92.79		95.05	98.8315	94.5946	87.4598
		15				86.6602	85.4237	71.2375					95.5204	98.741	111.533	93.1781		96	100.292	94.6847	90.1929
		16				88.0071	84.4068	69.0078					95.7839	98.0808	110.803	93.5662		97.3	100.941	95.1802	88.9603
		17				89.3541	83.3898	66.7781					96.0474	97.4205	110.073	93.9543		98.6	101.59	95.6757	87.7278
		18				90.7011	82.3729	64.5485					92.1827	95.3478	104.331	92.7004		99.9	102.24	96.1712	86.4952
		19				89.841	83.1977	62.0847					93.1928	95.3478	105.45	92.3869		99.9333	102.824	96.2462	87.3526
		20				88.9809	84.0226	59.621					94.2029	95.3478	106.569	92.0734		99.9667	103.408	96.3213	88.2101
Fig4e, lesion scores	days	WT Rp												sca2::Tn
	0	0	0	0		0	0	0		0	0	0		0	0	0	0	0	0	0	0
	1	0	0	0		0	0	0		0	0	0		0	0	0	0	0	0	0	0
	2	1	1	1		0	0	0		0	0	0		1	1	1	1	0	0	0	0
	3	1.5	1	1		0.5	0.5	0.5		0	0	0.5		1.5	1.5	1.5	2	1	1	1.5	1.5
	4	2	1	1		1	1	1		0	0	1		2	2	2	3	2	2	2.75	2.75
	5	2	2	2.5		1.5	1.25	1.125		0.5	0.5	1		2	2.5	3	4	2.625	2.75	3.125	2.875
	6	2.66667	2.66667	3		2	1.5	1.25		1	1.5	2.5		2.66667	2.66667	3.25	4	3.25	3.5	3.5	3
	7	3.33333	3.33333	3.5		2.75	1.5	1.625		1	2	3.5		3.33333	2.83333	3.5	4	3.25	3.5	3.375	3.25
	8	4	4	4		3.5	1.5	2		1.17	2.17	3.5		4	3	3.75	4	3.25	3.5	3.25	3.5
	9	4	4	4		3.41667				1.33	2.33	3.5		3.33333	2.33333	3.75	4	2.75	3.33333	3	3.25
	10	4	4	4		3.33333				1.5	2.5	3.5		2.66667	1.66667	3.75	4	2.25	3.16667	2.75	3
	11	4	4	4		3.25				2	2.75	3.5		2	1	3.75	4	1.75	3	2.5	2.75
	12	3	4	4		3.125				2.5	3	3.5		2	1	3.75	4	1.25	3	2.25	2.375
	13	3	3	4		3				2.5	3.25	3.25		2	1	3.75	4	0.75	3	2	2
	14	3	3	4		2.9375				2.5	3.5	3		2	0	3.5	4	0.625	2.9375	1.625	1.875
	15	2	2.5	3		2.875				2.6	3.4	2.7		1	0	2	4	0.5	2.875	1.25	1.75
	16	1.66667	2.33333	3.16667		2.8125				2.7	3.3	2.4		0.666667	0	1.66667	4	0.375	2.8125	0.875	1.625
	17	1.33333	2.16667	3.33333		2.75				2.8	3.2	2.1		0.333333	0	1.33333	4	0.25	2.75	0.5	1.5
	18	1	2	3.5						2.9	3.1	1.8		0	0	1	4	0.166667	2.5	0.333333	1
	19	0.666667	1.66667	3.33333						3	3	1.5		0	0.333333	0.666667	4	0.0833333	2.25	0.166667	0.5
	20	0.333333	1.33333	3.16667						2.75	2.25	1.25		0	0.666667	0.333333	4	0	2	0	0
Fig4g			larger area, 10^7 Rp				injection site, smaller area, 10^7 Rp				larger area, 10^6 Rp			smaller area, 10^6 Rp				Larger area, 10^5 Rp		Smaller area, 10^5 Rp
			WT Rp in Ifnar-/- Ifngr-/- mice	sca2::Tn in Ifnar-/- Ifngr-/- mice	WT Rp in WT mice		WT Rp, Ifnar-/- Ifngr-/- mice	sca2::Tn Rp, Ifnar-/- Ifngr-/- mice	WT Rp, WT mice		WT Rp, Ifnar Ifngr mice	sca2::Tn Rp, Ifnar-/-Ifngr-/- mice		WT Rp, Ifnar-/- Ifngr-/- mice	sca2::Tn Rp, Ifnar-/-Ifngr-/- mice			WT Rp	sca2::Tn Rp	WT Rp	sca2::Tn Rp
			226.807	142.424	198.338		198.45	158.14	108.216		202.752	102.752		439.437	301.408			787.209	816.279	1034.48	1362.07
			201.632	200	331.994		246.512	220.155	122.799		192.661	127.523		407.042	581.69			454.651	1047.67	759.483	1293.1
			305	259	125		144.857	414.286	75.5238									367.442	237.209	650	506.897
			587	683	28.0734		465.714	448.571	79.1549		333.38	95.1524		168.601	43.5167			391.86		624.138
			483	218	114.679		331.429	357.143	264.789		172.022	211.496		120.129	97.7407
			499	234	122.018		385.714	173.714	233.803		353.463	179.64		204.135	124.236			219.806	156.094	164.083	74.942
											690.72	492.659		301.286	231.452			247.507	178.947	152.786	85.2117
											193.613	115.497		399.405	166.026
											120.557	131.31		289.58	366.719
Fig 4h	L. monocytogenes	WT Lm spleen	ΔactA spleen	WT Lm liver	ΔactA liver
	CFU	35250000	9550	15650000	300
		5825000	13500	8250000	200
		550000	5500	46700	2050
		550000	1400	67500	100
		4200000	5500	14500000	100
		9250000	1850	31400000	100
			5400		2100
Fig4i		WT spleen	sca2::TN spleen	WT liver	sca2::TN liver
10^7 Rp, IV		5500	4850	800	5800
		13250	10000	1200	2400
		16000	8000	800	10400
		6000	6000	1000	8400
		4750	9000	600	11000
		1520	12400	1040	14080
		2400	2320	2960	9120
		7680	1280	2400	11680
		2720	14000	1600	20000
		3160	3440	1280	6400
Fig 4J		WT spleen	sca2::Tn spleen	WT liver	sca2::Tn liver
10^7 Rp, ID		136000	2240	56800	13600
		20800	2480	22400	29440
		152000	5920	152000	10880
		198400	52000	83200	83200
		228800	23760	136000	107200
		114400	7200	100800	49600
		144800	45600	211200	60800
Fig 4k		WT spleen	sca2::Tn spleen	WT liver	sca2::Tn liver
10^5 Rp, ID		32300	11200	18000	12000
		208000	24800	27400	5600
		143000		50400
		12600	22000	40000	16000
		72000	2000	100000	32000
		44000	2800	28000	21200
		40000	1800	60000	5600
