# Supplementary material for: Interferon receptor-deficient mice are susceptible to eschar-associated rickettsiosis
Source: eLife. 2021 Aug 23;10:e67029. doi: 10.7554/eLife.67029 (PMC8428839; doi:10.7554/eLife.67029)
Supplement: Figure 5—source data 1. [file elife-67029-fig5-data1.xlsx]

## Sheet: Fig5 and Fig6
		Figure 5: ompB mutant R. parkeri elicit no lethality and reduced skin lesion formation in Ifnar-/-Ifngr-/- mice.
		Legend: a) Survival of Ifnar-/-Ifngr-/- mice upon i.d. infection with 107 PFU of R. parkeri. n=6 (WT) and 8 (ompB::TnSTOP) individual mice. Data are the combination of two independent experiments. Data for WT are the same as in Fig. 4c. b) Weight changes of Ifnar-/-Ifngr-/- mice upon i.d. infection with 107 PFU of R. parkeri. n=6 (WT) and 8 (ompB::TnSTOP) individual mice. Data are the combination…
Fig 5a, ompb survival			WT	ompB::TnStop
		8	1
		9	1
		40	0
		21	1
		36	1
		40	0
		40		0
		40		0
		40		0
		40		0
		40		0
		40		0
		40		0
		40		0
Fig 5b, ompb weight	WT										ompB::TnStop
0	100	100		100	100	100					100	100	100	100		100	100	100		100
1	100	98.2014		99.5375	99.2373	98.6622					100	100	100	100		100	100	100		100
2	98.8485	96.7626		99.075	98.4746	97.3244					99.0698	101.389	101.802	100		100	99.4828	98.7226		99.6667
3	97.697	95.3237		97.7361	96.3559	97.3244					98.1395	102.778	103.604	100		100	98.9655	97.4453		99.3333
4	96.5455	93.8849		96.3973	94.2373	97.3244					97.6744	99.0741	100	96.6102		99.2308	96.5517	94.8905		100.333
5	91.9091	90.3058		94.1091	91.1864	93.9799					97.6744	98.6111	99.5495	97.3729		98.8462	96.5517	95.2555		98
6	87.2727	86.7266		89.8085	88.4746	93.2441					96.5116	99.0741	98.1982	97.4576		98.8462	96.8966	96.3504		102.333
7	84.2182	83.1835		85.508	85.7627	86.7559					101.86	101.389	102.703	98.3051		99.2308	96.5517	94.1606		101.667
8	81.1636	79.6403		81.2074	83.0508	80.2676					103.256	102.778	104.505	99.5763		98.0769	95.8621	92.3358		100
9		78.5971		83.1386	83.0508	80.1561					103.411	102.16	103.303	99.0113		98.8462	95.2874	93.674		99.4444
10				85.0698	83.0508	80.0446					103.566	101.543	102.102	98.4463		99.6154	94.7126	95.0122		98.8889
11				87.001	83.0508	79.9331					103.721	100.926	100.901	97.8814		100.385	94.1379	96.3504		98.3333
12				85.297	83.0508	75.2508					100	99.7222	100.45	97.4576		99.2308	94.4828	95.2555		99
13				84.2259	84.3729	70.1338					99.0698	100.833	101.802	96.6102		99.2308	95.1724	98.1752		102
14				87.7799	84.678	72.8428					97.6744	101.389	100.45	96.1864		96.9231	90.3448	94.1606		99.6667
15				86.6602	85.4237	71.2375					101.395	101.852	99.5495	95.339		100	94.4828	95.9854		100
16				88.0071	84.4068	69.0078					100.775	102.16	100.3	95.4802		99.2308	94.1379	95.8637		100.622
17				89.3541	83.3898	66.7781					100.155	102.469	101.051	95.6215		98.4615	93.7931	95.7421		101.244
18				90.7011	82.3729	64.5485					99.5349	102.778	101.802	95.7627		97.6923	93.4483	95.6204		101.867
19				89.841	83.1977	62.0847					97.6744	101.852	100.901	94.4915		96.9231	92.4138	95.2555		100
20				88.9809	84.0226	59.621					99.3798	102.469	100.45	94.0678		97.8205	93.7931	96.2287		101.111
Fig 5c, lesion scores
	WT													ompB::TnStop
0		0	0	0		0	0	0		0	0	0		0	0	0	0		0	0	0		0
1		0	0	0		0	0	0		0	0	0		0	0	0	0		0	0	0		0
2		1	1	1		0	0	0		0	0	0		0	0	0	0		0	0	0		0
3		1.5	1	1		0.5	0.5	0.5		0	0	0.5		0	0	0	0		0	0.25	0		0
4		2	1	1		1	1	1		0	0	1		0.5	0.75	0	1		0.25	1	0		0
5		2	2	2.5		1.5	1.25	1.125		0.5	0.5	1		1	1.75	1.25	2		1	2.25	1		0
6		2.66667	2.66667	3		2	1.5	1.25		1	1.5	2.5		2.5	2.25	2	1.5		1.5	2.75	2.75		0.25
7		3.33333	3.33333	3.5		2.75	1.5	1.625		1	2	3.5		3	2.75	2	1.5		2.25	3	2.75		1
8		4	4	4		3.5	1.5	2		1.17	2.17	3.5		2.75	2.5	1.5	0.5		2	3	3		1.5
9		4	4	4		3.41667				1.33	2.33	3.5		2	2.33333	1.08333	0.416667		2	2.91667	2.83333		1.16667
10		4	4	4		3.33333				1.5	2.5	3.5		1.25	2.16667	0.666667	0.333333		2	2.83333	2.66667		0.833333
11		4	4	4		3.25				2	2.75	3.5		0.5	2	0.25	0.25		2	2.75	2.5		0.5
12		3	4	4		3.125				2.5	3	3.5		0	2	0	0		2	2.75	2		0
13		3	3	4		3				2.5	3.25	3.25		0	1.25	0	0		2	2.5	1.75		0
14		3	3	4		2.9375				2.5	3.5	3		0	0.75	0	0		2	2.25	1.5		0
15		2	2.5	3		2.875				2.6	3.4	2.7		0	0.5	0	0		1.5	2	1.5		0
16		1.66667	2.33333	3.16667		2.8125				2.7	3.3	2.4		0	0.333333	0	0		1	2	1.08333		0
17		1.33333	2.16667	3.33333		2.75				2.8	3.2	2.1		0	0.166667	0	0		0.5	2	0.666667		0
18		1	2	3.5						2.9	3.1	1.8		0	0	0	0		0	2	0.25		0
19		0.666667	1.66667	3.33333						3	3	1.5		0	0	0	0		0	2	0.25		0
20		0.333333	1.33333	3.16667						2.75	2.25	1.25		0	0	0	0		0	1.41667	0.166667		0
