# Supplementary material for: Interferon receptor-deficient mice are susceptible to eschar-associated rickettsiosis
Source: eLife. 2021 Aug 23;10:e67029. doi: 10.7554/eLife.67029 (PMC8428839; doi:10.7554/eLife.67029)
Supplement: Figure 6—source data 1. [file elife-67029-fig6-data1.xlsx]

## Sheet: Sheet1
			Figure 6: ompB and sca2 mutant R. parkeri elicit immunity in Ifnar-/-Ifngr-/- mice.
			Legend: a) Survival of immunized and naïve Ifnar-/-Ifngr-/- mice upon i.v. R. parkeri infection. Immunized mice were first infected with 5x106 PFU of sca2::Tn or 107 PFU of ompB:TnSTOP R. parkeri and were re-challenged 40 d later with 107 WT R. parkeri. n=6 (naïve); n=5 (sca2::Tn immunized); n=5 (ompB::TnSTOP immunized) individual mice. Data are the combination of two independent experiments. b) …
	Fig 6a, survival, IV	days	ompB::TnStop immunized i.v.	sca2::Tn immunized i.v.	naïve
		40	0
		40	0
		40	0
		40	0
		40	0
		40	0
		40		0
		40		0
		40		0
		40		0
		40		0
		40		0
		40		0
		5			1
		5			1
		5			1
		5			1
		5			1
		5			1
Fig6b, weight		days	sca2 immunized weight				ompB immunized weight				naive weight
		0	100	100	100		100	100	100		100	100	100
		1	99.6721	100.418	100.329		99.3304	100.1	103.066		99.4	97.9	99.8
		2	100.197	100.921	100.822		98.6607	100.199	106.132		99.5	96.55	97.8
		3	99.8361	101.255	99.4408		98.3631	100.066	105.031		97.12	93.56	94.54
		4	100	99.5816	100.099		98.0655	99.9337	103.931		95.8	91.25	91.9
		5	99.4426	99.5816	97.1217		97.7679	99.801	102.83		90.5	86.5	87.45
		6	98.8852	99.5816	94.1447		97.2098	100.92	102.736
		7	98.7541	98.954	96.5132		96.6518	102.04	102.642
		8	98.623	98.3264	98.8816		95.9821	101.592	100.33
		9	98.4918	97.6987	101.25		95.7143	101.716	100.578
		10	98.3607	97.0711	103.618		95.4464	101.841	100.825
		11	97.9508	96.8619	102.714		95.1786	101.965	101.073
		12	98.2172	97.228	103.269		94.9107	102.09	101.321
		13	98.4836	97.5941	103.824		94.8438	101.94	101.698
		14	98.75	97.9603	104.379		94.7768	101.791	102.075
		15	99.0164	98.3264	104.934		94.7098	101.642	102.453
		16	98.3607	97.9079	104.057		94.6429	101.493	102.83
		17	97.7049	97.4895	103.18		94.6094	103.358	103.09
		18	97.0492	97.0711	102.303		94.5759	105.224	103.349
		19	97.2951	96.8619	102.056		94.5424	107.09	103.608
		20	97.541	96.6527	101.809		94.5089	108.955	103.868
fig5c, 6c temperature			sca2 immunized temp				ompB immunized temp				naive temp
		0	98.5	98.8	97.3		98.1	97.6	98.4		98.6	97.5	97.8
		1	98.4	98.6	97.225		97.55	97.05	98.4		99.9	99.3	99.15
		2	98.3	98.4	97.15		97	96.5	98.4		101.2	101.1	100.5
		3	98.2	98.2	97.075		98.2	97.8	98.7667		99.4	99.5	100.1
		4	98.1	98	97		99.4	99.1	99.1333		98.5	99.1	98.9
		5	97.875	97.975	97.275		100.6	100.4	99.5		88.3	84.5	89.1
		6	97.65	97.95	97.55		100.35	99.7	98.8
		7	97.425	97.925	97.825		100.1	99	98.1
		8	97.2	97.9	98.1		99.8	98.2	98
		9	97.525	98.1	97.975		99.85	98.4	98
		10	97.85	98.3	97.85		99.9	98.6	98
		11	98.175	98.5	97.725		99.95	98.8	98
		12	98.5	98.7	97.6		100	99	98
		13	98.55	98.7	97.625		100.05	98.875	97.9
		14	98.6	98.7	97.65		100.1	98.75	97.8
		15	98.65	98.7	97.675		100.15	98.625	97.7
		16	98.7	98.7	97.7		100.2	98.5	97.6
		17	98.6	98.75	97.5		98.1	97.6	98.4
		18	98.5	98.8	97.3		98.1	97.6	98.4
		19	98.75	98.75	97.3		97.55	97.05	98.4
		20	99	98.7	97.3		97	96.5	98.4
Fig 6e I.D. rechallenge, survival	days	naïve mice, Ifnar-/-Ifngr-/- 105 ID challenge	sca2::Tn immunized i.v., challenged ID	sca2::Tn immunized i.d, challenged ID	ompB::TnSTOP immunized i.d, challenged ID
	13	1
	14	1
	28	1
	38	1
	40	0
	40	0
	40	0
	40		0
	40		0
	40		0
	40		0
	40		0
	40			0
	40			0
	40			0
	40			0
	40			0
	40			0
	40			0
	40			0
	40				0
	40				0
	40				0
	40				0
	40				0
	40				0
	40				0
	40				0
Fig 6e, I.D. rechallenge lesion scores			Immunized sca2::Tn, ID												Immunized sca2::Tn, IV												Immunized ompBSTOP::Tn, ID												Ifnar-/-Ifngr-/- 105
		0	0	0	0	0	0		0	0	0				0	0	0	0	0								0	0	0	0		0	0	0		0			0	0	0	0	0	0	0
		1	0	0	0	0	0		0	0	0				0	0	0	0	0								0	0	0	0		0	0	0		0			0	0	0	0	0	0	0
		2	0	0	0	0	0		0	0	0				0	0	0	0	0								0	0	0	0		0	0	0		0			0	0	0	0	0	0	0
		3	0	0	0	0	0		0	0	0				0	0	0	0	0								0	0	0	0		0	0	0		0			0	0	0	0	0	0	0
		4	0	1.5	3	2	1.5		0.5	0	1.5				0	0	0	0	0								1.25	2	1.25	2		1.75	3	2.5		1.25			0.25	0	0.25	0.5	0.25	0	0
		5	0	0.875	2.75	1.875	0.75		0.25	0	1.375				0	0	0	0	0								1.75	1.625	1.625	2		1.75	3	2.375		1.25			0.75	1	1	0.5	0.5	0	0
		6	0	0.25	2.5	1.75	0		0	0	1.25				0	0	0	0	0								2.25	1.25	2	2		1.75	3	2.25		1.25			1.5	1.5	1	1.25	1.25	1.25	1.25
		7	0	0	2	1.75	0		0	0	1.25				0	0	0	0	0								1	1	1.25	1.5		1.5	3	2.5		1			1.75	2	1.5	1.75	2	1.5	1.5
		8	0	0.25	2	0.25	0		0	0	0.75				0	0	0	0	0								0.5	0.5	0.25	0.5		0.5	3	2.25		0			2	2.25	1.75	2	2	2	1.5
		9	0	0.166667	1.75	0.166667	0		0	0	0.5				0	0	0	0	0								0.416667	0.416667	0.166667	0.416667		0.416667	3	2.33333		0			2.5	2.5	2	2	2	2.25	2
		10	0	0.0833333	1.5	0.0833333	0		0	0	0.25				0	0	0	0	0								0.333333	0.333333	0.0833333	0.333333		0.333333	3	2.41667		0			2.75	2.25	2	2	2.25	2.25	2.25
		11	0	0	1.25	0	0		0	0	0				0	0	0	0	0								0.25	0.25	0	0.25		0.25	3	2.5		0			2.5	2.25	2.25	2.5	2.5	2.75	2.2
		12	0	0	0.625	0	0		0	0	0				0	0	0	0	0								0.125	0.125	0	0.25		0.25	2.875	2.5		0			2	2	1.75	3.25	2.25	2.25	2.25
		13	0	0	0	0	0		0	0	0				0	0	0	0	0								0	0	0	0.25		0.25	2.75	2.5		0			2	2	1.75	3	2.5	2.5	3
		14	0	0	0	0	0		0	0	0				0	0	0	0	0								0	0	0	0.125		0.125	2.75	2.5		0			2		1.5	3	2.5	2.5	3.25
		15	0	0	0	0	0		0	0	0				0	0	0	0	0								0	0	0	0		0	2.75	2.5		0			2			2.75	2.5	2.75	2.25
		16	0	0	0	0	0		0	0	0				0	0	0	0	0								0	0	0	0		0	2.75	2.5		0			2			2.5	2.25	2.5	2
		17	0	0	0	0	0		0	0	0				0	0	0	0	0								0	0	0	0		0	2.75	2.5		0			2			2	2	2.75	2
		18	0	0	0	0	0		0	0	0				0	0	0	0	0								0	0	0	0		0	2.75	2.5		0			2.25			2.25	1.25	2	1.5
		19	0	0	0	0	0		0	0	0				0	0	0	0	0								0	0	0	0		0	2.75	2.5		0			2.5			2.75	1	2	1
		20	0	0	0	0	0		0	0	0				0	0	0	0	0								0	0	0	0		0	2.75	2.5		0			2.25			2.5	1	2	1
